# Supplementary material for: Insights into Vibrio cholerae Intestinal Colonization from Monitoring Fluorescently Labeled Bacteria
Source: PubMed Central journal article supplement (PMC4183697; doi:10.1371/journal.ppat.1004405), 2014-10-02
Supplement: ppat.1004405.s002.pdf [file ppat.1004405.s002.pdf]

A

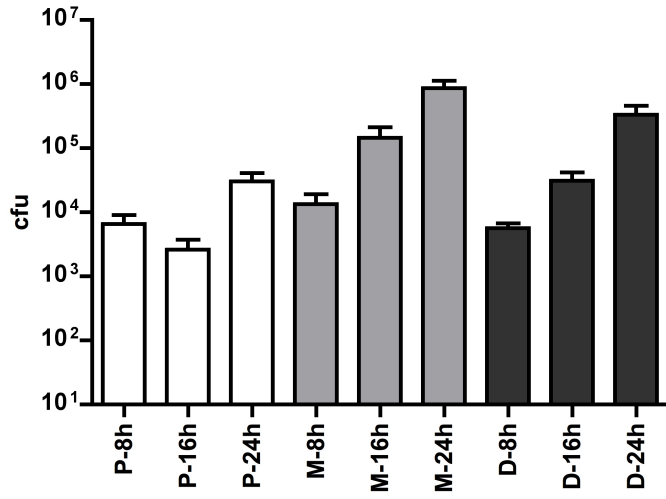

B

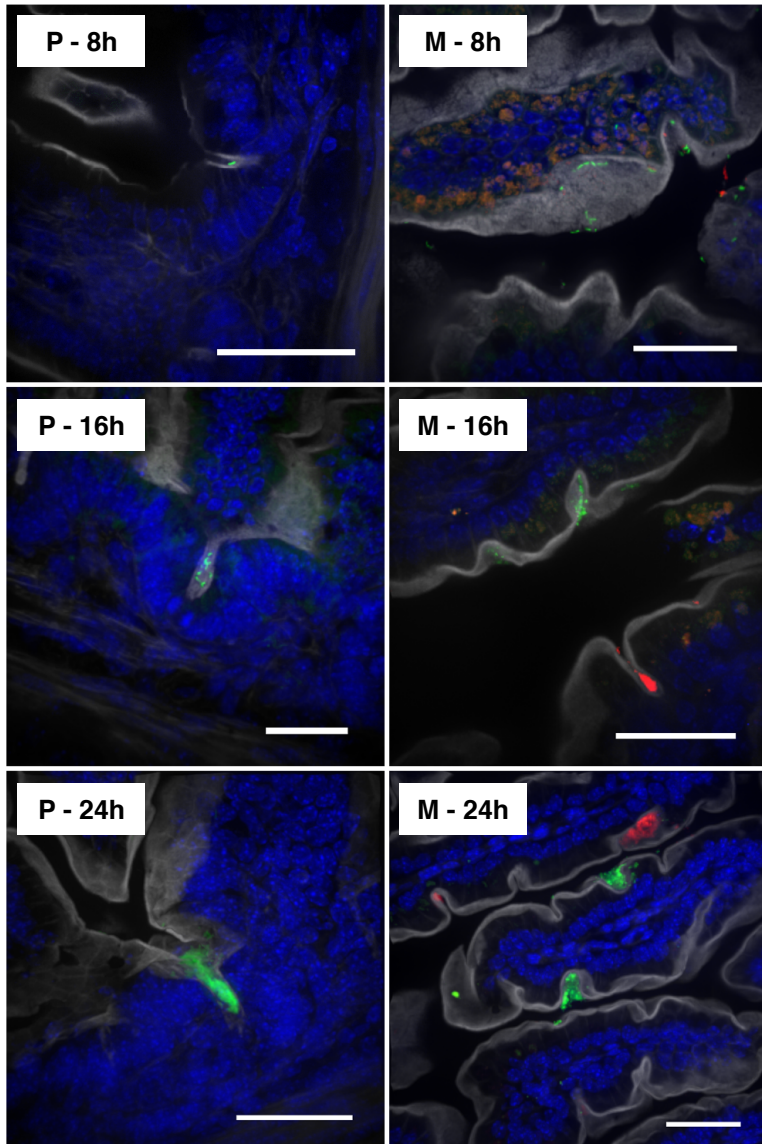

Fig. S2
