# Supplementary material for: Insights into Vibrio cholerae Intestinal Colonization from Monitoring Fluorescently Labeled Bacteria
Source: PubMed Central journal article supplement (PMC4183697; doi:10.1371/journal.ppat.1004405), 2014-10-02
Supplement: ppat.1004405.s006.pdf [file ppat.1004405.s006.pdf]

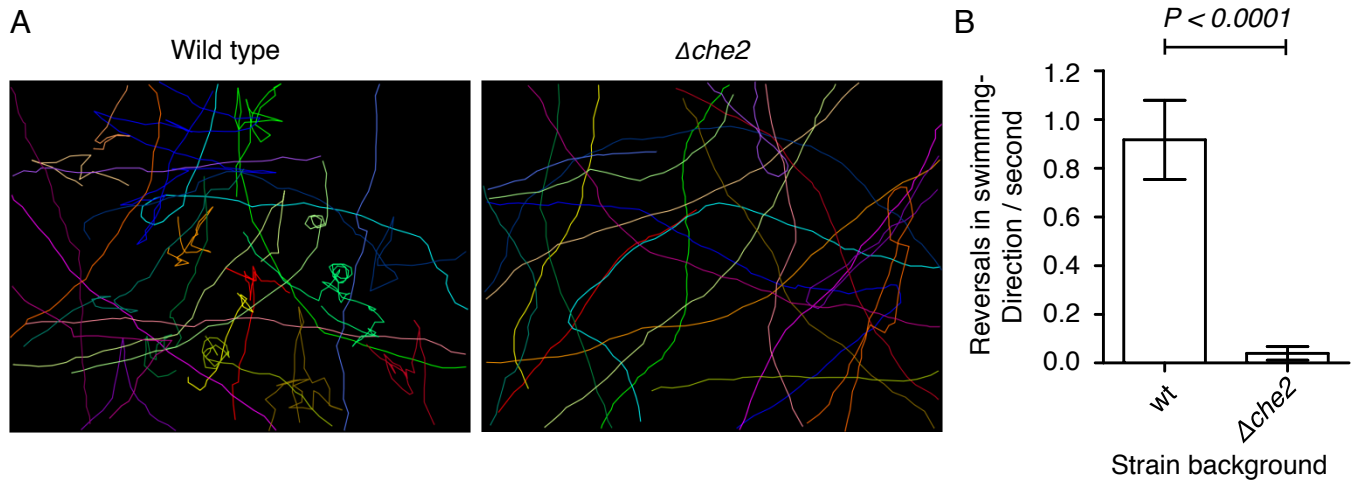

Fig. S6
